# Supplementary material for: High-resolution carbon dioxide concentration record 650,000–800,000 years before present
Source: Springer Nature journal article supplement (doi:10.1038/nature06949), 2008-05-01
Supplement: 41586_2008_BFnature06949_MOESM30_ESM.pdf [file 41586_2008_BFnature06949_MOESM30_ESM.pdf]

## Supplemental Material

### Methods:

The analytical methods for CO<sub>2</sub> measurements used at the University of Bern and at LGGE in Grenoble are based on dry extraction techniques followed by laser absorption spectroscopy and gas chromatography, respectively. In Bern, four to six samples (2.3 x 2.3 x 1.6 cm; 8 grams) from each depth level (every 55 cm) in the ice core are measured in random order (two on the same day; the following two after all depth intervals have been measured twice). The samples are crushed by a cooled needle cracker under vacuum conditions. The sample container is connected to a cold trap for several minutes in order to avoid fractionation due to a slower release of CO<sub>2</sub> relative to N<sub>2</sub> and O<sub>2</sub> from clathrates. Afterwards, the air is expanded to a measuring cell, where a laser is tuned six times over the absorption line of a vibration-rotation transition of the CO<sub>2</sub> molecule. For calibration, we use a CO<sub>2</sub> in air standard gas with a concentration of 251.65 ppmv calibrated to the WMO mole fraction scale.

The blank level is evaluated using bubblefree ice samples. After the evacuation CO<sub>2</sub> in air standard gas is introduced into the crusher and the routine protocol is run. The amount of standard gas is chosen so that the amount of CO<sub>2</sub> in the cell is similar to the amount usually extracted from ice core samples. These test measurements have been performed using CO<sub>2</sub> in air standard gas with concentrations of 197.65 ppmv, 251.65 ppmv and 321.1 ppmv. An uncertainty of the device of 1.5 ppmv has been derived.

1237 samples from 289 depth levels have been measured including remeasurements in the part published earlier<sup>29</sup>. The average standard deviation of the mean of four to six samples is 1.3 ppmv over the whole record. Four validation measurements have been done by extracting the air by a sublimation device similar to the one described by Güllük et al.<sup>30</sup>.

The 61 (14 below and 47 above 3190 m) Grenoble measurements have been done with a method slightly modified compared to Barnola et al.<sup>31</sup>. On every depth level one to three samples of about 40 g of ice are crushed under vacuum conditions. About 20 minutes later, the extracted gas is expanded in the sample loop of the gas chromatograph and analysed. Depending on the amount of the extracted air, three to five successive analyses are performed. In order to avoid the possible influence of the water vapour injected with the gas, the CO<sub>2</sub> ratio is calculated as the ratio between the CO<sub>2</sub> peak and the air (O<sub>2</sub>+N<sub>2</sub>) peak. The calibration is conducted using an Air Liquide<sup>®</sup> standard scaled on three CSIRO standards (260,3 ppmv, 321,1 ppmv and 172,8 ppmv).

#### **Comparison of the Bern and Grenoble CO<sub>2</sub> data:**

Figure S1 shows all CO<sub>2</sub> data from the clathrate zone of Dome C measured in both labs consisting of values of MIS 11<sup>29</sup> (11 values) and MIS 16 – 19 (47 values). The Bern values have been interpolated to the depth levels of the samples measured in Grenoble. The characteristics of the mean regression line are summarized in ST1.

Considering all common data, the slope of the regression line is significantly different from 1, indicating a possible non-linearity in at least one of the analytical systems. Furthermore, the Grenoble measurements average 3.1 ppmv higher than the values obtained at Bern. Standard gas measurements, however, performed at both labs, conducted using the same procedure with the same standard gases for calibration as during the usual ice sample measurements, do not support these observations (see ST2). An extended intercomparison study will be done to examine differences in the two labs. The proposed nonlinearity and offset between Bern and Grenoble measurements do not question any of the conclusions in the main text.

**Lowest CO<sub>2</sub> concentrations ever measured in an ice core:**

The lowest CO<sub>2</sub> concentration measured at Bern (172 ppmv, 667 kyr BP) is not confirmed to the full extent by the laboratory in Grenoble (178 ppmv). Comparing Bern and Grenoble results for MIS 11, 16 and 19 in the Dome C ice core has shown that Bern gets slightly lower values for samples with low CO<sub>2</sub> concentration. This raises the question whether measurements in Bern would be lower than those from Grenoble during the Vostok interval (last 440 kyr BP).

The lowest CO<sub>2</sub> concentration found in the Vostok ice core is 182 ppmv 20 kyr BP<sup>32</sup>. This age has also been measured on Dome C<sup>33</sup> and Taylor Dome ice<sup>34</sup>, respectively, by the University of Bern (Figure S2). In fact, Bern measurements are slightly higher than those of Grenoble in both ice cores (184 and 188 ppmv). Furthermore, preliminary measurements on Dome C ice during MIS 6 performed at the University of Bern show similar concentrations as measured on the Vostok ice core in Grenoble. Taking this into account, we conclude that the CO<sub>2</sub> values during MIS 16 (172 ppmv) and MIS 18 (177 ppmv) are the lowest values ever found in ice cores and this with a difference of 10 ppmv.

**Time relationship between CO<sub>2</sub> and Antarctic temperature:**

Determination of the exact timing of CO<sub>2</sub> versus temperature changes is complicated by the age of the occluded air being younger than the surrounding ice<sup>35</sup> by up to 5200 years. This so called  $\Delta$ age can be calculated with a densification model. Comparison of ice and gas records of the EPICA cores suggests that the computed  $\Delta$ age for low accumulation sites has probably previously been overestimated by up to a few hundred years<sup>36</sup>. Applying the new EDC3 ice age time scale<sup>37</sup> and the currently best estimate for the gas age scale (EDC3\_gas\_a)<sup>36</sup> alters

the lag of CO<sub>2</sub> for terminations VII and VI from 2800 and 1600<sup>29</sup> to 900 and 1900 yr, respectively, and turns the one for termination V from 800 yr into a lead of CO<sub>2</sub> of 300 yr. Similar calculations for the new data yield a lag of 400 and 2300 yr for terminations IX and VIII, respectively. Compared to the time scales of glacial cycles, these time lags are small and do not question the important role of CO<sub>2</sub> as an amplifier of the large temperature rise during deglaciations. A special case remains MIS 14.2 (about 550 kyr BP) when CO<sub>2</sub> preceded changes in deuterium by about  $2000 \pm 500$  yr (EDC2 timescale)<sup>29</sup>. Using the new timescales, this lead reduces to  $1100 \pm 500$  yr. Again unknown processes during firnification may affect  $\Delta$ age during MIS 14.2.

#### **Choice of the intervals for the calculation of mean values of CO<sub>2</sub>:**

Figure S3 illustrates the accuracy of the mean values due to the choice of the interval definition. The initial and end points of the intervals shown as dashed black lines in figure 2 and in figure S3 below are centred in every second glacial period including two interglacials. The accuracy of the choice of the intervals is calculated by a Monte Carlo simulation randomly shifting the interval boundaries by  $\pm 10$  kyr (except for 799 kyr BP: only - 10 kyr). The statistical results are listed in table ST4 and included as grey areas in figure S3 demonstrating the independence of the result from the choice of the intervals position. The splines according to Enting<sup>38</sup> with a cut-off period of 200 kyr indicate the trends discussed in the paper.

#### **CO<sub>2</sub> and isotopic changes during ice age terminations:**

Figure S4 shows a compilation of  $\delta$ D and CO<sub>2</sub> results across termination I to IX. Together with the lags of CO<sub>2</sub> against deuterium, two significantly different patterns of transitions are

found: The one between 796 and 787 kyr BP ( $T_{IX}$ ), with its more or less linear  $CO_2$  increase of about 8 ppmv/kyr, resembles those observed during the last five terminations (7.8 - 12 ppmv/kyr), all of them with a strong coupling to deuterium reaching the top without longer lasting interruptions (except the Antarctic cold reversal during termination I). The  $CO_2$  increases of  $T_{VI}$  -  $T_{VIII}$  show a different pattern with two distinct intervals: First (interval I)  $CO_2$  rises rapidly at a rather constant rate of 9 - 14 ppmv/kyr during 3 - 4 kyr with a similar relationship to the temperature as discussed for terminations I - V and IX. In a second interval (II), with stable or slowly rising Deuterium values,  $CO_2$  increases for an other couple of 1000 years gradually at a mean rate of 1.2 - 1.9 ppmv/kyr (a more detailed discussion will be presented elsewhere).

## References

29. Siegenthaler, U. et al. Stable carbon cycle-climate relationship during the Late Pleistocene. *Science* **310**, 1313-1317 (2005).
30. Güllük, T., Slemr, F. & Stauffer, B. Simultaneous measurements of CO<sub>2</sub>, CH<sub>4</sub>, N<sub>2</sub>O, in air extracted by sublimation from Antarctica ice cores: confirmation of the data obtained using other extraction techniques. *Journal of Geophysical Research* **103**, 15971-15978 (1998).
31. Barnola, J. M., Raynaud, D., Korotkevich, Y. S. & Lorius, C. Vostok ice core provides 160,000-year record of atmospheric CO<sub>2</sub>. *Nature* **329**, 408-414 (1987).
32. Petit, J. R. et al. Climate and atmospheric history of the past 420,000 years from the Vostok ice core, Antarctica. *Nature* **399**, 429-436 (1999).
33. Monnin, E. et al. Atmospheric CO<sub>2</sub> concentrations over the last glacial termination. *Science* **291**, 112-114 (2001).
34. Indermühle, A., Monnin, E., Stauffer, B., Stocker, T. F. & Wahlen, M. Atmospheric CO<sub>2</sub> concentration from 60 to 20 kyr BP from the Taylor Dome ice core, Antarctica. *Geophysical Research Letters* **27**, 735-738 (2000).
35. Schwander, J. & Stauffer, B. Age difference between polar ice and the air trapped in its bubbles. *Nature* **311**, 45-47 (1984).
36. Loulergue, L. et al. New constraints on the gas age-ice age difference along the EPICA ice cores, 0–50 kyr. *Climate of the Past* **3**, 527-540 (2007).
37. Parrenin, F. et al. The EDC3 chronology for the EPICA Dome C ice core. *Climate of the Past* **3**, 485-497 (2007).
38. Enting, I. G. On the use of smoothing splines to filter CO<sub>2</sub> data. *Journal of Geophysical Research* **92**, 10977-10984 (1987).
39. Jouzel, J. et al. Orbital and millennial Antarctic climate variability over the last 800,000 years. *Science* **317**, 793-796 (2007).

40. Pepin, L., Raynaud, D., Barnola, J. M. & Loutre, M. F. Hemispheric roles of climate forcings during glacial-interglacial transitions as deduced from the Vostok record and LLN-2D model experiments. *Journal of Geophysical Research* **106**, 31885-31892 (2001).
41. Raynaud, D. et al. The record for marine isotopic stage 11. *Nature* **436**, 39-40 (2005).

**Tables:**

| Equation            | 1 $\sigma$ of the slope | 1 $\sigma$ of the axis intercept (ppmv) | R <sup>2</sup> | X <sub>mean</sub> (ppmv) | Y <sub>mean</sub> (ppmv) | Y <sub>mean</sub> - X <sub>mean</sub> (ppmv) |
|---------------------|-------------------------|-----------------------------------------|----------------|--------------------------|--------------------------|----------------------------------------------|
| y=0.938x+17.22 ppmv | 0.020                   | 4.66                                    | 0.974          | 227.57                   | 230.64                   | 3.07 ± 1.01 (2 $\sigma$ )                    |

**ST1:** Characteristics of the mean regression line shown in figure S1. R<sup>2</sup> is the squared coefficient of correlation of the Bern and Grenoble values. X<sub>mean</sub> is the average of the interpolated Bern data, Y<sub>mean</sub> the average of the Grenoble data. Y<sub>mean</sub> - X<sub>mean</sub> is the mean difference between Grenoble and Bern values.

| Lab      | Standard     | Theoretical value (ppmv) | Measured value (ppmv) | Standard deviation (1 $\sigma$ ) |
|----------|--------------|--------------------------|-----------------------|----------------------------------|
| Bern     | SIO 197      | 197.11                   | 198.2                 | 1.03                             |
| Bern     | SIO 251      | 251.65                   | 251.5                 | 0.82                             |
| Bern     | SIO 321      | 321.1                    | 321.5                 | 0.92                             |
| Bern     | Grenoble 233 | 233.5                    | 234.3                 | 0.64                             |
| Grenoble | Bern SIO 251 | 251.65                   | 251.2                 | 0.69                             |
| Grenoble | CSIRO 1630   | 321.1                    | 321.0                 | 0.8                              |
| Grenoble | CSIRO 1657   | 172.8                    | 172.7                 | 0.62                             |
| Grenoble | CSIRO 1677   | 260.26                   | 260.0                 | 0.72                             |

**ST2:** Results of CO<sub>2</sub> in air standard gas measurements performed at the University of Bern with laser absorption spectroscopy and at LGGE in Grenoble by gas chromatography. For the calibration, SIO 251 is used at Bern and 233.5 ppmv standard is used at Grenoble. The measured values are averages of 10-20 single measurements. The standard deviation is calculated for a single measurement.



|                                            | Marine Isotope Stage 3 |        |        |        | MIS 18 |      |      |
|--------------------------------------------|------------------------|--------|--------|--------|--------|------|------|
| Event                                      | AIM 8                  | AIM 12 | AIM 14 | AIM 17 | A      | B    | C    |
| $\Delta\text{temp}$ ( $^{\circ}\text{C}$ ) | 2.27                   | 2.77   | 2.28   | 3.14   | 2.12   | 2.19 | 1.99 |
| $\Delta\text{CH}_4$ (ppbv)                 | 137                    | 74     | 97     | 112    | 77     | 65   | 96   |
| $\Delta\text{CO}_2$ (ppmv)                 | 15.0                   | 16.7   | 14.5   | 12.3   | 15.5   | 14.3 | 16.7 |
| $\Delta t$ $\text{CH}_4$ rise (years)      | 830                    | 648    | 488    | 896    | 638    | 462  | 616  |

**ST3:** Comparison of the AIM events during MIS 3 and the found events during MIS 18. Magnitudes ( $\Delta\text{temp}$ ,  $\Delta\text{CH}_4$  and  $\Delta\text{CO}_2$ ) are calculated taking the difference between the maximum of each event and the mean of the preceding and the following minimum value.  $\Delta t$   $\text{CH}_4$  rise is the duration of the main  $\text{CH}_4$  rise. This duration is influenced by the smoothing time of the low accumulation record of Dome C and, hence, can not be compared with results of other ice cores.

| Temperature   |               |           |                                   |                                  |                                      |                                      |                                       |
|---------------|---------------|-----------|-----------------------------------|----------------------------------|--------------------------------------|--------------------------------------|---------------------------------------|
| Interval      | Initial point | End point | Mean ( $^{\circ}\text{C}$ / ppmv) | Standard deviation ( $1\sigma$ ) | Minimum ( $^{\circ}\text{C}$ / ppmv) | Maximum ( $^{\circ}\text{C}$ / ppmv) | $\Delta$ ( $^{\circ}\text{C}$ / ppmv) |
| I             | 50,000        | 270,000   | - 5.5                             | 0.08                             | - 5.7                                | - 5.3                                | 0.4                                   |
| II            | 270,000       | 450,000   | - 4.9                             | 0.14                             | - 5.1                                | - 4.4                                | 0.7                                   |
| III           | 450,000       | 650,000   | - 5.1                             | 0.10                             | - 5.3                                | - 4.8                                | 0.5                                   |
| IV            | 650,000       | 799,000   | - 5.5                             | 0.14                             | - 5.9                                | - 5.2                                | 0.7                                   |
| $\text{CO}_2$ |               |           |                                   |                                  |                                      |                                      |                                       |
| I             | 50,000        | 270,000   | 221.6                             | 0.8                              | 220.2                                | 223.6                                | 3.4                                   |
| II            | 270,000       | 450,000   | 233.8                             | 1.6                              | 232.2                                | 239.9                                | 7.7                                   |
| III           | 450,000       | 650,000   | 226.9                             | 1.3                              | 223.5                                | 229.6                                | 6.1                                   |
| IV            | 650,000       | 799,000   | 211.9                             | 1.2                              | 210.0                                | 212.6                                | 2.6                                   |

**ST4:** Results of the Monte Carlo simulation randomly shifting the initial and end points within  $\pm 10$  kyr (except for 799 kyr BP: only within 0 and -10 kyr; 10,000 iterations).

**Figures:**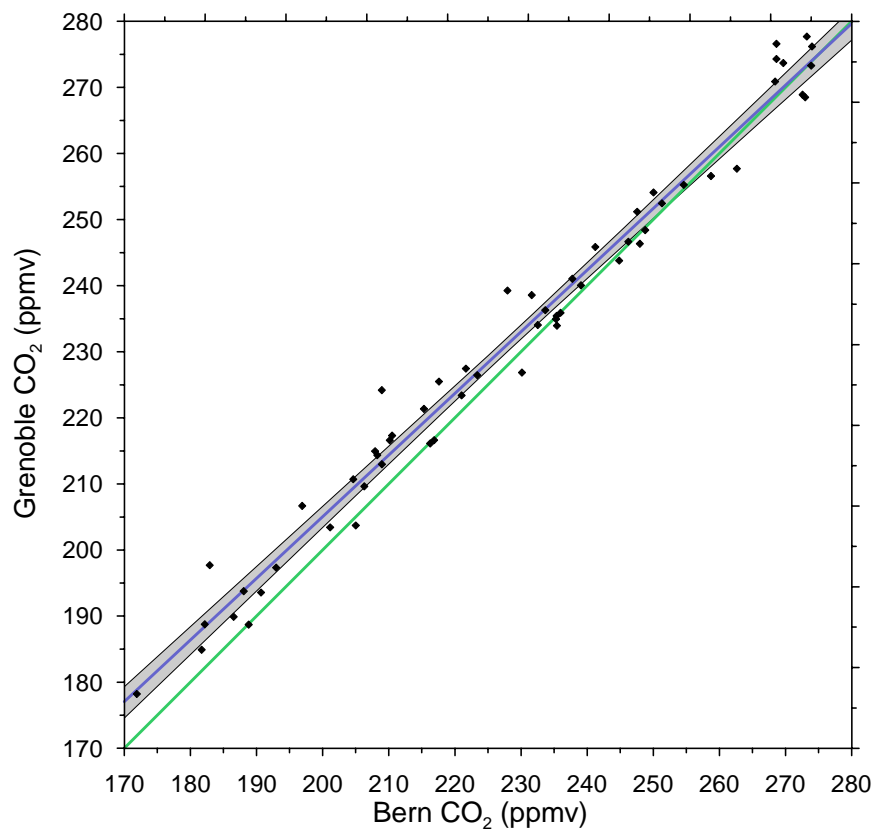

**Figure S1:** Comparison of Bern and Grenoble measurements. Black full diamonds: Dome C CO<sub>2</sub> values of MIS 11<sup>29</sup> and MIS 16-19 measured at LGGE in Grenoble plotted against the ones measured at the University of Bern (interpolated on the depth levels of the Grenoble samples). The grey area visualizes the Monte Carlo simulation results (10,000 realisations) for a possible range of regression lines calculated for Bern and Grenoble values fluctuating within the  $2\sigma$ -uncertainty of 2.6 ppmv and 3 ppmv, respectively. The blue line is the mean regression line whereas in green the 1:1 line is given.

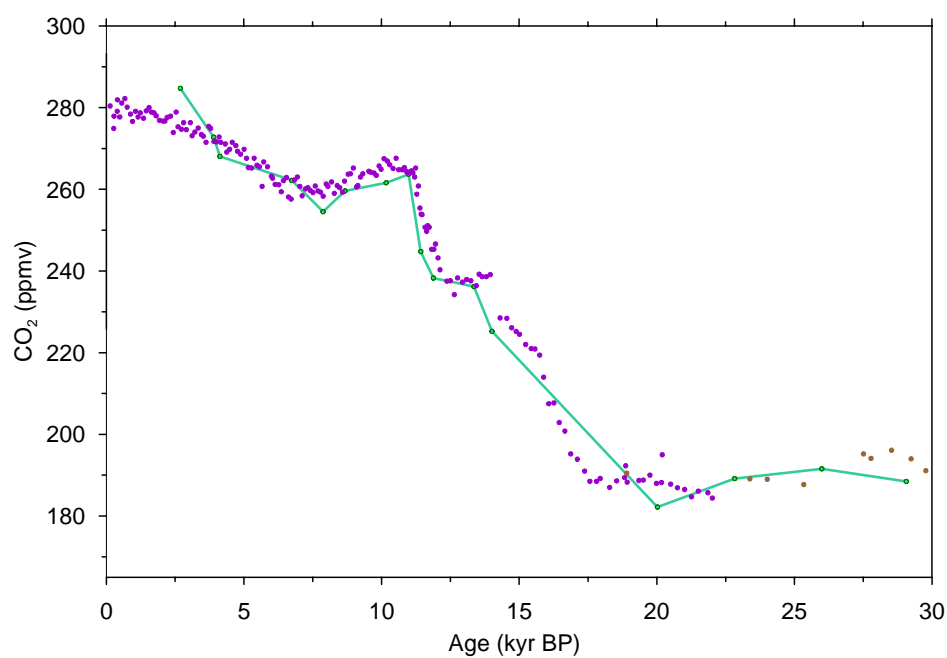

**Figure S2:** Lowest atmospheric concentration of CO<sub>2</sub> ever measured on the Vostok ice core<sup>32</sup> (green; 182 ppmv at 20 kyr BP; obtained at LGGE in Grenoble) compared to values measured on Dome C<sup>33</sup> (pink) and Taylor Dome ice<sup>34</sup> (brown), respectively, at the University of Bern.

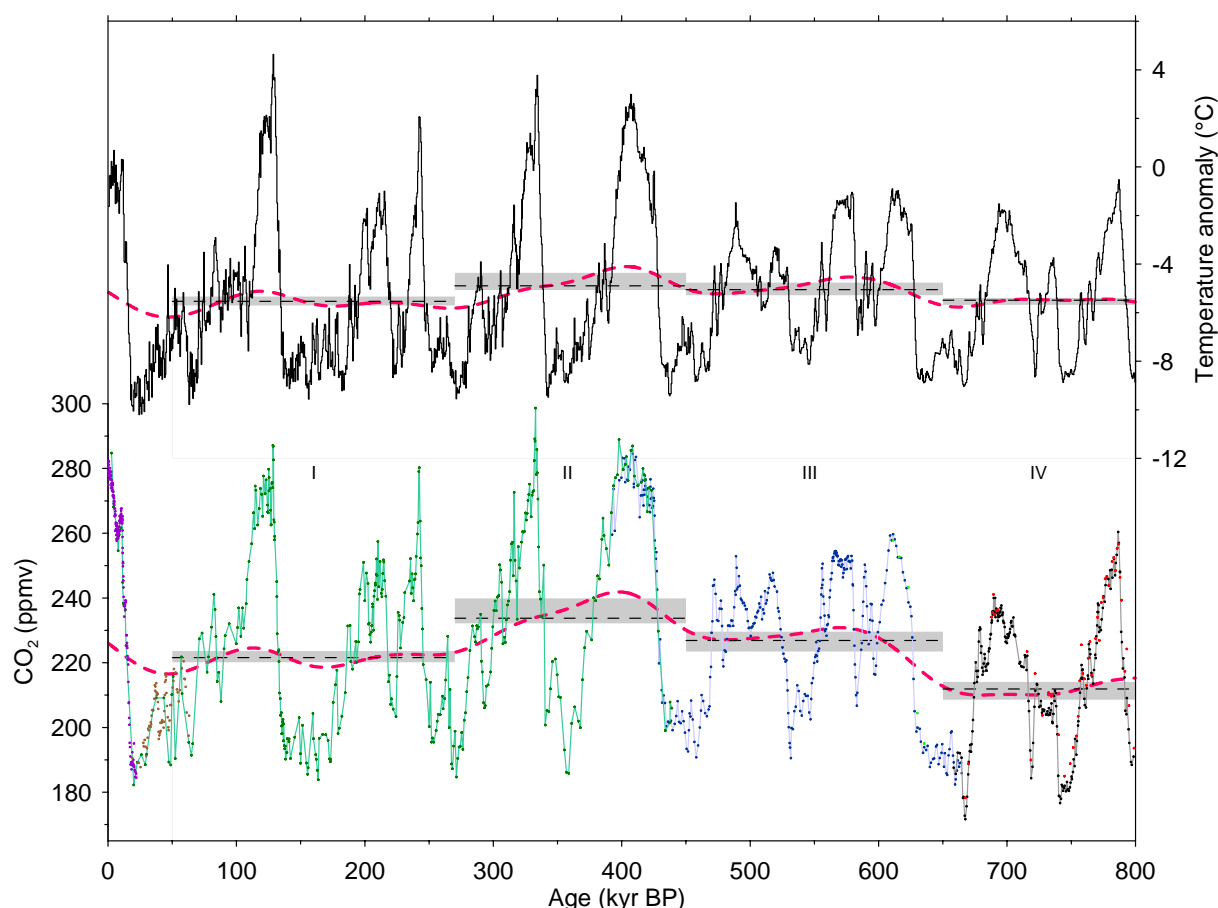

**Figure S3:** The Dome C temperature anomaly record with respect to the mean temperature of the last millennium<sup>39</sup> (original data interpolated to a 500-yr resolution), plotted on the EDC3 timescale<sup>37</sup>, is given as a black line. Purple solid circles: Dome C CO<sub>2</sub> measurements of Monnin et al.<sup>33</sup>; brown: CO<sub>2</sub> measured on Taylor Dome ice<sup>34</sup>; green: Vostok CO<sub>2</sub><sup>32, 40, 41</sup>; blue: Dome C CO<sub>2</sub><sup>29</sup>; light green (650 - 600 kyr BP) and black solid circles: Dome C CO<sub>2</sub> data of this work measured in Bern; red open circles: Dome C CO<sub>2</sub> data of this work measured at LGGE in Grenoble. All CO<sub>2</sub> values are on the EDC3\_gas\_a age scale<sup>36</sup>. The dashed black lines (also shown in figure 2) are mean values of CO<sub>2</sub> and temperature anomaly of the intervals represented by Roman numerals (799-650, 650-450, 450-270 and 270-50 kyr BP). The grey area illustrates the mean values calculated shifting the initial and end point of the intervals by  $\pm 10$  kyr randomly (Monte Carlo simulation; 10,000 iterations; for the initial

point of interval IV (799 kyr BP) only - 10 kyr). The red dashed lines are splines according to Enting<sup>38</sup> with a cut-off period of 200 kyr.

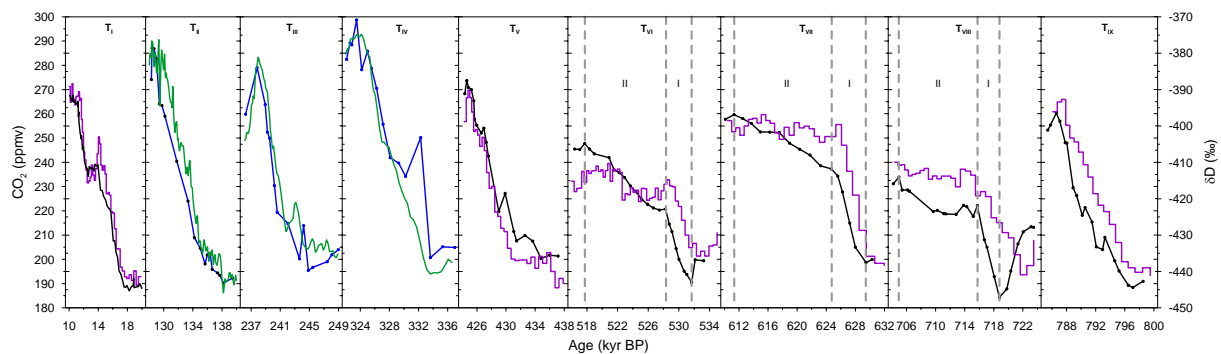

**Figure S4:** Compilation of  $\delta D$  and  $CO_2$  values across nine glacial-interglacial transitions (terminations I to IX,  $T_I$  to  $T_{IX}$ ). The purple step curves in termination I and V-IX indicate Dome C Deuterium<sup>39</sup> ( $\delta D$ , proxy for local temperature); The black curve represents the Dome C  $CO_2$  concentrations; termination I<sup>33</sup>: mean of six samples plotted on the EDC3\_gas\_a age scale<sup>36</sup>; terminations V-VII<sup>29</sup>: mean of four to six samples (EDC3\_gas\_a age scale); terminations VIII and IX: mean of four to six samples (this work; EDC3\_gas\_a age scale). Vostok Deuterium<sup>32</sup> with an offset of + 40 ‰ (because of different distances to the open ocean, elevations and surface temperature of Vostok and Dome C) is given by the green curve and Vostok  $CO_2$  is shown in blue curves<sup>32</sup>, all of them plotted on the GT4 gas and ice time scale. The dashed grey lines indicate the two different intervals with respect to the  $CO_2$  increase during terminations VI-VIII.
